# Supplementary material
Source: ML conference proceedings conference paper supplement (https://openreview.net/forum?id=RTzbr0k56C)
Supplement: supplementary_material [file human_evaluation_teacher_student.xlsx]

## Sheet: Sheet1
Slide Number	Student Position	Subject 1	Subject 2	Subject 3	Subject 4	Subject 5	Subject 6	Subject 7	Subject 8	Subject 9	Subject 10	Subject 11	Subject 12	Subject 13	Subject 14	Subject 15	Subject 16	Subject 17	Subject 18	Subject 19	Subject 20	Subject 21	Subject 22	Subject 23	Subject 24	Subject 25	Subject 26	Subject 27	Subject 28	Subject 29	Subject 30
1	1	1	1	2	1	2	2	1	1	1	1	1	1	1	2	1	2	2	1	1	1	2	1	2	2	2	2	2	2	1	2
2	1	1	1	2	1	2	2	1	1	2	1	1	1	1	2	1	1	2	1	2	1	2	1	1	2	1	2	1	2	1	1
3	2	2	2	2	1	1	2	2	2	2	1	2	2	1	2	2	2	1	2	2	2	1	2	2	1	1	2	2	2	2	1
4	1	2	1	2	2	1	2	1	1	1	2	1	1	2	2	2	1	2	2	1	2	2	1	2	2	2	1	2	2	1	2
5	2	2	2	2	2	2	2	2	2	2	2	2	2	2	2	2	2	2	1	2	1	2	1	1	1	2	1	2	1	2	2
6	1	1	1	2	2	2	1	1	1	1	1	1	2	1	1	1	2	1	1	2	2	2	2	1	2	2	1	2	1	1	2
7	1	1	1	2	2	1	1	2	1	1	1	2	1	2	2	1	2	1	2	1	2	1	1	2	1	1	2	2	1	2	1
8	2	1	2	1	2	1	1	1	2	1	1	1	2	1	2	2	2	1	1	2	1	1	1	1	2	2	1	1	1	1	1
9	2	2	2	1	2	2	2	1	2	1	1	2	1	1	2	2	1	2	2	2	1	2	1	1	1	2	2	1	2	1	2
10	1	1	2	1	1	2	1	2	1	2	1	1	2	2	2	2	2	2	2	1	2	1	1	2	2	1	2	1	2	2	2
		Student	Student	Teacher	Student	Teacher	Teacher	Student	Student	Student	Student	Student	Student	Student	Teacher	Student	Teacher	Teacher	Student	Student	Student	Teacher	Student	Teacher	Teacher	Teacher	Teacher	Teacher	Teacher	Student	Teacher
		Student	Student	Teacher	Student	Teacher	Teacher	Student	Student	Teacher	Student	Student	Student	Student	Teacher	Student	Student	Teacher	Student	Teacher	Student	Teacher	Student	Student	Teacher	Student	Teacher	Student	Teacher	Student	Student
		Student	Student	Student	Teacher	Teacher	Student	Student	Student	Student	Teacher	Student	Student	Teacher	Student	Student	Student	Teacher	Student	Student	Student	Teacher	Student	Student	Teacher	Teacher	Student	Student	Student	Student	Teacher
		Teacher	Student	Teacher	Teacher	Student	Teacher	Student	Student	Student	Teacher	Student	Student	Teacher	Teacher	Teacher	Student	Teacher	Teacher	Student	Teacher	Teacher	Student	Teacher	Teacher	Teacher	Student	Teacher	Teacher	Student	Teacher
		Student	Student	Student	Student	Student	Student	Student	Student	Student	Student	Student	Student	Student	Student	Student	Student	Student	Teacher	Student	Teacher	Student	Teacher	Teacher	Teacher	Student	Teacher	Student	Teacher	Student	Student
		Student	Student	Teacher	Teacher	Teacher	Student	Student	Student	Student	Student	Student	Teacher	Student	Student	Student	Teacher	Student	Student	Teacher	Teacher	Teacher	Teacher	Student	Teacher	Teacher	Student	Teacher	Student	Student	Teacher
		Student	Student	Teacher	Teacher	Student	Student	Teacher	Student	Student	Student	Teacher	Student	Teacher	Teacher	Student	Teacher	Student	Teacher	Student	Teacher	Student	Student	Teacher	Student	Student	Teacher	Teacher	Student	Teacher	Student
		Teacher	Student	Teacher	Student	Teacher	Teacher	Teacher	Student	Teacher	Teacher	Teacher	Student	Teacher	Student	Student	Student	Teacher	Teacher	Student	Teacher	Teacher	Teacher	Teacher	Student	Student	Teacher	Teacher	Teacher	Teacher	Teacher
		Student	Student	Teacher	Student	Student	Student	Teacher	Student	Teacher	Teacher	Student	Teacher	Teacher	Student	Student	Teacher	Student	Student	Student	Teacher	Student	Teacher	Teacher	Teacher	Student	Student	Teacher	Student	Teacher	Student
		Student	Teacher	Student	Student	Teacher	Student	Teacher	Student	Teacher	Student	Student	Teacher	Teacher	Teacher	Teacher	Teacher	Teacher	Teacher	Student	Teacher	Student	Student	Teacher	Teacher	Student	Teacher	Student	Teacher	Teacher	Teacher
164	Num of student	8	9	3	6	4	6	6	10	6	6	8	7	4	5	8	5	4	5	8	3	4	6	3	2	6	4	4	4	6	4
136	Num of teacher	2	1	7	4	6	4	4	0	4	4	2	3	6	5	2	5	6	5	2	7	6	4	7	8	4	6	6	6	4	6
Total	300
Student ratio	0.546667
Teacher ratio	0.453333
